# Supplementary material
Source: PubMed Central journal article supplement (PMC6517657)
Supplement: ba030171-suppl1.pdf [file ba030171-suppl1.pdf]

**Supplemental table 1. Multiple regression analysis excluding dUCB transplants**

|                                  | GRFS *                  |              | CRFS*                   |              | aGVHD III-IV **         |              | cGVHD                         |               | Relapse ***      |         | LFS ****                     |              | OS *             |         |
|----------------------------------|-------------------------|--------------|-------------------------|--------------|-------------------------|--------------|-------------------------------|---------------|------------------|---------|------------------------------|--------------|------------------|---------|
| Factor                           | HR (95% CI)             | P value      | HR (95% CI)             | P value      | HR (95% CI)             | P value      | HR (95% CI)                   | P value       | HR (95% CI)      | P value | HR (95% CI)                  | P value      | HR (95% CI)      | P value |
| <b>Donor/graft type</b>          |                         |              |                         |              |                         |              |                               |               |                  |         |                              |              |                  |         |
| Single unit UCB                  | 1                       |              | 1                       |              | 1                       |              | 1                             |               | 1                |         | 1                            |              | 1                |         |
| 7/8-BM                           | 1.13 (0.87-1.46)        | NS           | 1.08 (0.83-1.40)        | NS           | <b>1.67 (1.14-2.46)</b> | <b>0.009</b> | <b>6.15 (2.13-17.74)</b><br># | <b>0.0008</b> | 1.48 (1.06-2.08) | 0.02    | <b>2.24 (1.27-3.93)</b><br># | <b>0.005</b> | 1.08 (0.80,1.45) | NS      |
| <b>Disease status</b>            |                         |              |                         |              |                         |              |                               |               |                  |         |                              |              |                  |         |
| Early                            | 1                       |              | 1                       |              | -                       | -            | -                             | -             | 1                |         | -                            | -            | -                | -       |
| Intermediate                     | 1.17 (1.02-1.35)        | 0.03         | 1.12 (0.97-1.29)        | NS           | -                       | -            | -                             | -             | 1.19 (0.96-1.48) | NS      | -                            | -            | -                | -       |
| <b>ATG/Alemtuzumab used</b>      |                         |              |                         |              |                         |              |                               |               |                  |         |                              |              |                  |         |
| Yes                              | 1                       |              | 1                       |              | -                       | -            | 1                             |               | -                | -       | -                            | -            | -                | -       |
| No                               | 1.19 (1.02-1.38)        | 0.03         | 1.12 (0.96-1.31)        | NS           | -                       | -            | <b>1.56 (1.25-1.94)</b>       | <b>0.0001</b> | -                | -       | -                            | -            | -                | -       |
| <b>Recipient race, ethnicity</b> |                         |              |                         |              |                         |              |                               |               |                  |         |                              |              |                  |         |
| White, Non-Hispanic              | 1                       |              | 1                       |              | 1                       |              | 1                             |               | -                | -       | 1                            |              | 1                |         |
| White, Hispanic                  | <b>1.33 (1.10-1.61)</b> | <b>0.003</b> | <b>1.38 (1.13-1.67)</b> | <b>0.001</b> | 1.17 (0.83-1.67)        | NS           | 1.37 (1.04-1.83)              | 0.03          | -                | -       | 1.16 (0.93-1.46)             | NS           | 1.19 (0.94-1.50) | NS      |

|                                   |                                   |               |                                   |              |                                   |               |                     |      |                |    |                                   |               |                         |                   |
|-----------------------------------|-----------------------------------|---------------|-----------------------------------|--------------|-----------------------------------|---------------|---------------------|------|----------------|----|-----------------------------------|---------------|-------------------------|-------------------|
| Non-white, Non-Hispanic           | <b>1.37</b><br><b>(1.14-1.64)</b> | <b>0.0009</b> | <b>1.36</b><br><b>(1.13-1.65)</b> | <b>0.001</b> | <b>1.74</b><br><b>(1.28-2.37)</b> | <b>0.0004</b> | 1.39<br>(1.04-1.86) | 0.03 | -              | -  | <b>1.34</b><br><b>(1.10-1.64)</b> | <b>0.004</b>  | <b>1.42 (1.15-1.75)</b> | <b>0.0009</b>     |
| Non-white, Hispanic               | 1.78<br>(1.03-3.06)               | 0.04          | 1.62<br>(0.93-2.83)               | NS           | <b>2.73</b><br><b>(1.27-5.87)</b> | <b>0.01</b>   | 0.35<br>(0.05-2.47) | NS   | -              | -  | 1.99<br>(1.10-3.59)               | 0.02          | <b>2.15 (1.21-3.79)</b> | <b>0.009</b>      |
| Missing                           | 1.22<br>(0.93-1.60)               | NS            | 1.33<br>(1.01-1.75)               | 0.05         | 0.82<br>(0.46-1.45)               | NS            | 1.32<br>(0.86-2.03) | NS   | -              | -  | 1.08<br>(0.79-1.47)               | NS            | 1.03 (0.75-1.43)        | NS                |
| <b>Karnofsky/Lansky score</b>     |                                   |               |                                   |              |                                   |               |                     |      |                |    |                                   |               |                         |                   |
| < 90                              | -                                 | -             | 1                                 |              | -                                 | -             | -                   | -    | -              | -  | 1                                 |               | 1                       |                   |
| >= 90                             | -                                 | -             | <b>0.78</b><br><b>(0.65-0.94)</b> | <b>0.01</b>  | -                                 | -             | -                   | -    | -              | -  | <b>0.68</b><br><b>(0.56-0.82)</b> | <b>0.0001</b> | <b>0.65 (0.53-0.80)</b> | <b>&lt;0.0001</b> |
| Missing                           | -                                 | -             | 0.80<br>(0.54-1.18)               | NS           | -                                 | -             | -                   | -    | -              | -  | 0.78<br>(0.51-1.18)               | NS            | 0.80 (0.52-1.21)        | NS                |
| <b>Donor-recipient CMV status</b> |                                   |               |                                   |              |                                   |               |                     |      |                |    |                                   |               |                         |                   |
| -/-                               | -                                 | -             | -                                 | -            |                                   |               |                     |      | -              | -  | 1                                 |               | 1                       |                   |
| -/+                               | -                                 | -             | -                                 | -            | 1.09<br>(0.84-1.40)               | NS            | -                   | -    | -              | -  | 1.34<br>(1.15-1.57)               | 0.0002        | <b>1.46 (1.24-1.71)</b> | <b>&lt;0.0001</b> |
| Missing                           | -                                 | -             | -                                 | -            | 1.80<br>(0.97-3.32)               | NS            | -                   | -    | -              | -  | 1.11<br>(0.66-1.83)               | NS            | 1.32 (0.80-2.17)        | NS                |
| <b>Year of HCT</b>                |                                   |               |                                   |              |                                   |               |                     |      |                |    |                                   |               |                         |                   |
| 2000 - 2003                       | 1                                 |               |                                   |              | -                                 | -             | -                   | -    | 1              |    | 1                                 |               | 1                       |                   |
| 2004 - 2007                       | 0.92<br>(0.76-                    | NS            | -                                 | -            | -                                 | -             | -                   | -    | 0.88<br>(0.67- | NS | 0.84<br>(0.68-                    | NS            | 0.83 (0.67-1.02)        | NS                |

|             |                                   |             |   |   |   |   |   |   |                     |       |                                   |              |                         |              |
|-------------|-----------------------------------|-------------|---|---|---|---|---|---|---------------------|-------|-----------------------------------|--------------|-------------------------|--------------|
|             | 1.10)                             |             |   |   |   |   |   |   | 1.15)               |       | 1.02)                             |              |                         |              |
| 2008 - 2011 | <b>0.77</b><br><b>(0.63-0.94)</b> | <b>0.01</b> | - | - | - | - | - | - | 0.77<br>(0.58-1.02) | NS    | <b>0.69</b><br><b>(0.55-0.87)</b> | <b>0.002</b> | <b>0.67 (0.53-0.85)</b> | <b>0.001</b> |
| 2012 - 2014 | 1.03<br>(0.80-1.32)               | NS          | - | - | - | - | - | - | 1.48<br>(1.08-2.03) | 0.014 | 1.12<br>(0.85-1.48)               | NS           | 0.99 (0.74-1.33)        | NS           |

\* Stratified variables: GVHD prophylaxis.

\*\* Stratified variables: Patient age.

\*\*\* Stratified variables: Disease, patient age.

\*\*\*\* Stratified variables: Disease, GVHD prophylaxis.

- Not applicable

# Beyond 14 months after HCT

Values in bold signify statistically significant p-values (<0.01)

N.S.; p-value > 0.05

Abbreviations: aGVHD III-IV; Acute GVHD grade III-IV; ATG, antithymocyte globulin; BM: bone marrow; cGVHD, chronic GVHD; CI: confidence interval; CMV: cytomegalovirus; CRFS: chronic GVHD-free relapse-free survival; GRFS: GVHD-free relapse-free survival; GVHD: graft versus host disease; HCT, hematopoietic cell transplantation; HR: hazards ratio; LFS, leukemia free survival; NRM, non-relapse mortality; OS, overall survival; UCB: umbilical cord blood.

**Supplemental table 2. Multiple regression analysis excluding 6/6-HLA matched UCB transplants**

|                                      | GRFS *                   |            | CRFS*                   |            | aGVHD III-IV **         |            | cGVHD                     |            | Relapse ***             |            | LFS ****                 |            | OS *                    |            |
|--------------------------------------|--------------------------|------------|-------------------------|------------|-------------------------|------------|---------------------------|------------|-------------------------|------------|--------------------------|------------|-------------------------|------------|
| Factor                               | HR<br>(95%<br>CI)        | P<br>value | HR<br>(95%<br>CI)       | P<br>value | HR<br>(95%<br>CI)       | P<br>value | HR<br>(95%<br>CI)         | P<br>value | HR<br>(95%<br>CI)       | P<br>value | HR<br>(95%<br>CI)        | P<br>value | HR<br>(95%<br>CI)       | P<br>value |
| <b>Donor/graft type</b>              |                          |            |                         |            |                         |            |                           |            |                         |            |                          |            |                         |            |
| 4-5/6 UCB                            | 1                        |            | 1                       |            | 1                       |            | 1                         |            | 1                       |            | 1                        |            | 1                       |            |
| 7/8-BM                               | 1.13<br>(0.86-<br>1.48)  | NS         | 1.06<br>(0.81-<br>1.40) | NS         | 1.61<br>(1.09-<br>2.38) | 0.017      | 6.78#<br>(2.15-<br>21.41) | 0.0011     | 1.59<br>(1.12-<br>2.25) | 0.009      | 2.20#<br>(1.22-<br>3.95) | 0.009      | 1.12<br>(0.83-<br>1.53) | NS         |
| <b>Disease status</b>                |                          |            |                         |            |                         |            |                           |            |                         |            |                          |            |                         |            |
| Early                                | 1                        |            | 1                       |            | -                       | -          | -                         | -          | 1                       |            | -                        | -          | -                       | -          |
| Intermediate                         | 1.10<br>(0.93-<br>1.29)  | NS         | 1.04<br>(0.88-<br>1.23) | NS         | -                       | -          | -                         | -          | 1.08<br>(0.84-<br>1.38) | NS         | -                        | -          | -                       | -          |
| <b>ATG/Alemtuzumab<br/>used</b>      |                          |            |                         |            |                         |            |                           |            |                         |            |                          |            |                         |            |
| Yes                                  | 1                        |            | 1                       |            | -                       | -          | 1                         |            | -                       | -          | -                        | -          | -                       | -          |
| No                                   | 1.20<br>(1.01 -<br>1.43) | 0.04       | 1.12<br>(0.93-<br>1.33) | NS         | -                       | -          | 1.63<br>(1.27-<br>2.09)   | 0.0001     | -                       | -          | -                        | -          | -                       | -          |
| <b>Recipient race,<br/>ethnicity</b> |                          |            |                         |            |                         |            |                           |            |                         |            |                          |            |                         |            |
| White, Non-Hispanic                  | 1                        |            | 1                       |            | 1                       |            | 1                         |            | -                       | -          | 1                        |            | 1                       |            |
| White, Hispanic                      | 1.25<br>(1.01-<br>1.54)  | 0.04       | 1.31<br>(1.05-<br>1.62) | 0.02       | 1.17<br>(0.80-<br>1.70) | NS         | 1.30<br>(0.95-<br>1.79)   | NS         | -                       | -          | 1.19<br>(0.93-<br>1.53)  | NS         | 1.16<br>(0.90-<br>1.51) | NS         |
| Non-white, Non-<br>Hispanic          | 1.20<br>(0.97-<br>1.48)  | NS         | 1.22<br>(0.98-<br>1.52) | NS         | 1.57<br>(1.11-<br>2.20) | 0.009      | 1.38<br>(1.00-<br>1.90)   | 0.05       | -                       | -          | 1.31<br>(1.04-<br>1.65)  | 0.02       | 1.33<br>(1.05-<br>1.69) | 0.02       |

|                                   |                         |    |                         |       |                         |    |                         |    |                         |    |                         |        |                         |        |
|-----------------------------------|-------------------------|----|-------------------------|-------|-------------------------|----|-------------------------|----|-------------------------|----|-------------------------|--------|-------------------------|--------|
| Non-white, Hispanic               | 1.36<br>(0.72-<br>2.60) | NS | 1.23<br>(0.63-<br>2.39) | NS    | 2.33<br>(0.94-<br>5.74) | NS | 0.37<br>(0.05-<br>2.64) | NS | -                       | -  | 1.62<br>(0.79-<br>3.34) | NS     | 1.79<br>(0.90-<br>3.56) | NS     |
| Missing                           | 1.31<br>(0.95-<br>1.81) | NS | 1.63<br>(1.18-<br>2.25) | 0.003 | 0.79<br>(0.40-<br>1.57) | NS | 1.34<br>(0.78-<br>2.28) | NS | -                       | -  | 1.24<br>(0.86-<br>1.78) | NS     | 1.09<br>(0.74-<br>1.60) | NS     |
| <b>Karnofsky/Lansky score</b>     |                         |    |                         |       |                         |    |                         |    |                         |    |                         |        |                         |        |
| < 90                              | -                       | -  | 1                       |       | -                       | -  | -                       | -  | -                       | -  | 1                       |        | 1                       |        |
| >= 90                             | -                       | -  | 0.76<br>(0.61-<br>0.95) | 0.01  | -                       | -  | -                       | -  | -                       | -  | 0.67<br>(0.54-<br>0.85) | 0.0007 | 0.66<br>(0.52-<br>0.83) | 0.0004 |
| Missing                           | -                       | -  | 0.97<br>(0.63-<br>1.50) | NS    | -                       | -  | -                       | -  | -                       | -  | 0.81<br>(0.49-<br>1.32) | NS     | 0.83<br>(0.51-<br>1.36) | NS     |
| <b>Donor-recipient CMV status</b> |                         |    |                         |       |                         |    |                         |    |                         |    |                         |        |                         |        |
| -/-                               | -                       | -  | -                       | -     | 1                       |    | -                       | -  | -                       | -  | 1                       |        | 1                       |        |
| -/+                               | -                       | -  | -                       | -     | 0.99<br>(0.75-<br>1.31) | NS | -                       | -  | -                       | -  | 1.33<br>(1.11-<br>1.59) | 0.002  | 1.46<br>(1.21-<br>1.75) | 0.0001 |
| Missing                           | -                       | -  | -                       | -     | 1.27<br>(0.61-<br>2.67) | NS | -                       | -  | -                       | -  | 0.99<br>(0.54-<br>1.80) | NS     | 1.11<br>(0.61-<br>2.01) | NS     |
| <b>Year of HCT</b>                |                         |    |                         |       |                         |    |                         |    |                         |    |                         |        |                         |        |
| 2000 - 2003                       | 1                       |    | -                       | -     | -                       | -  | -                       | -  | 1                       |    | 1                       |        | 1                       |        |
| 2004 - 2007                       | 0.96<br>(0.78-<br>1.19) | NS | -                       | -     | -                       | -  | -                       | -  | 0.84<br>(0.60-<br>1.16) | NS | 0.83<br>(0.65-<br>1.05) | NS     | 0.82<br>(0.64-<br>1.04) | NS     |
| 2008 - 2011                       | 0.79<br>(0.62-<br>1.01) | NS | -                       | -     | -                       | -  | -                       | -  | 0.83<br>(0.60-<br>1.17) | NS | 0.72<br>(0.55-<br>0.95) | 0.02   | 0.70<br>(0.53-<br>0.92) | 0.01   |

|             |                         |    |  |  |   |   |   |   |                         |      |                         |    |                         |    |
|-------------|-------------------------|----|--|--|---|---|---|---|-------------------------|------|-------------------------|----|-------------------------|----|
| 2012 - 2014 | 1.19<br>(0.89-<br>1.59) | NS |  |  | - | - | - | - | 1.62<br>(1.12-<br>2.34) | 0.01 | 1.25<br>(0.91-<br>1.73) | NS | 1.12<br>(0.80-<br>1.57) | NS |
|-------------|-------------------------|----|--|--|---|---|---|---|-------------------------|------|-------------------------|----|-------------------------|----|

\* Stratified variables: GVHD prophylaxis.

\*\* Stratified variables: Patient age.

\*\*\* Stratified variables: Disease, patient age.

\*\*\*\* Stratified variables: Disease, GVHD prophylaxis.

- Not applicable

# Beyond 14 months after HCT

N.S.; p-value > 0.05

Abbreviations: aGVHD III-IV; Acute GVHD grade III-IV; ATG, antithymocyte globulin; BM: bone marrow; cGVHD, chronic GVHD; CI: confidence interval; CMV: cytomegalovirus; CRFS: chronic GVHD-free relapse-free survival; GRFS: GVHD-free relapse-free survival; GVHD: graft versus host disease; HCT, hematopoietic cell transplantation; HR: hazards ratio; LFS, leukemia free survival; NRM, non-relapse mortality; OS, overall survival; UCB: umbilical cord blood.

**Supplemental table 3. Causes of death**

|                         | <b>UCB<br/>(N =1441)</b> | <b>7/8 BM<br/>(N =172)</b> | <b>p-value</b> |
|-------------------------|--------------------------|----------------------------|----------------|
| Number of deaths, n (%) | 678 (47)                 | 98 (57)                    | 0.01           |
| Cause of death, n (%)   |                          |                            | 0.01           |
| Primary disease         | 291 (43)                 | 42 (43)                    |                |
| GVHD                    | 83 (12)                  | 20 (20)                    |                |
| Infection               | 85 (13)                  | 4 (4)                      |                |
| Organ failure           | 83 (12)                  | 17 (17)                    |                |
| IPS/ARDS                | 43 (6)                   | 10 (10)                    |                |
| Graft failure           | 15 (2)                   | 0                          |                |
| Hemorrhage              | 21 (3)                   | 1 (1)                      |                |
| Other                   | 57 (8)                   | 4 (4)                      |                |

*Abbreviations: ARDS, acute respiratory distress syndrome; BM = Bone marrow, GVHD, graft versus host disease; IPS, idiopathic pneumonia syndrome; UCB = Umbilical cord blood*

*\* “Other” causes of death include: secondary malignancy (n=7 and n=1), vascular (n=3 and n=0), accident/suicide (n=2 and n=0), other (n=34 and n=1) and missing (n=11 and n=2).*
